# Supplementary material
Source: HighWire-hosted journal article supplement (https://adc.bmj.com/content/103/8/757)
Supplement: inline-supplementary-material-1 [file inline-supplementary-material-1.docx]

**Web supplement**

**Reliability of anthropometric measurements in children with special needs**

Jane Hardy1, Hayley Kuter2, Malcolm Campbell 3, Dexter Canoy4

1Department of Community Paediatrics, Manchester University NHS Foundation Trust, UK

2Department of Community Paediatric Dietetics, Manchester University NHS Foundation Trust, UK

3Division of Nursing, Midwifery & Social Work, School of Health Sciences, The University of Manchester, UK

4The George Institute for Global Health (UK), University of Oxford, UK

**Table of contents**

Table S1. Duration (number of seconds) of obtaining measurements in children with special needs .………………………………………………………………………………………………………………………………………. Page 2

Table S2. Percentage of successful first measurements in standers and non-standers….… Page 3

Table S3. Reasons for difficulty in obtaining segmental measurements and supine length in non- standers …………………………………………………………………………………………………………………………. Page 4

Table S4. Reasons for difficulty in obtaining waist circumferences, weight and bioimpedance in non-standers ……………………………………………………………………………………………………………………….... Page 5

Table S5. Reasons for difficulty in obtaining skinfold measurements in standers ……………. Page 6

Table S6. Reasons for difficulty in obtaining waist circumferences and bioimpedance in standers ………………………………………………………………………………………………………………………………………. Page 7

**Table S1. Duration (seconds) of obtaining measurements in children with special needs.**

| Measurement | Non-standers  (n=30) | Standers  (n=23) |
| --- | --- | --- |
|  | Median (IQR) | Median (IQR) |
| Supine length or height | 42 (30 to 76) | 29 (18 to 40) |
| Tibial length | 23 (18 to 64) | - |
| Upper arm length | 29 (20 to 42) | - |
| Knee height | 47 (20 to 54) | - |
| Subscapular skinfold thickness | 29 (17 to 34) | 48 (29 to 72) |
| Triceps skinfold thickness  Biceps skinfold thickness  Supra-iliac skinfold thickness  Mid upper arm circumference  True waist circumference  Umbilical waist circumference | 27 (23 to 36)  36 ( 25 to 57)  -  34 (30 to 56)  39 ( 20 to 85)  26 ( 18 to 47) | 34 (25 to 41)  37 ( 34 to 41)  48 (31 to 85)  73 ( 60 to 85)  63 (48 to 95)  58 (35 to 93) |
| Weight | 70 ( 48 to 87) | 20 ( 10 to 39) |
| Bioimpedance analysis | 294 (216-342) | 113* |

IQR – interquartile range; *Only one measurement was timed.

**Table S2. Percentage of successful first measurements in standers and non-standers.**

| **Measurement** | **Non-stander (n=30)** | **Stander (n=23)** |
| --- | --- | --- |
|  | % (n) of successful first measurements | % (n) of successful first measurements |
| Supine length or height | 93 (28) | 100 (23) |
| Tibial length | 100 (30) | - |
| Upper arm length | 90 (27) | - |
| Knee height | 90 (27) | - |
| Weight | 97 (29) | 100 (23) |
| True waist circumference | 93 (28) | 83 (19) |
| Umbilical waist circumference | 87 (26) | 74 (17) |
| Mid-upper arm circumference | 93 (28) | 100 (23) |
| Triceps skinfold thickness | 90 (27) | 78 (18) |
| Biceps skinfold thickness | 87 (26) | 78 (18) |
| Subscapular skinfold thickness | 90 (27) | 61 (14) |
| Supra-iliac skinfold thickness | Not possible | 43 (10) |
| Bioimpedance | 83 (25) | 74 (17) |

Table S3. Reasons for difficulty in obtaining segmental measurements and supine length in non-standers.

|  | Supine length | Upper arm length | Tibial length | Knee height |
| --- | --- | --- | --- | --- |
| Not possible to obtain measurement | n= 4 | n=5 (one child only had measurement at second visit) | n = 1 (one child only had measurement at second visit) | n = 1 |
| *Reason(s)* | *Couldn’t lie still too distressed (n=2); Couldn’t*  *lie straight (n=1); Plaster cast in situ*  *(n=1)* | *Moved during measurement*  *(n=3); Very distressed and vision poor (n= 1); Too distressed (n=1)* | *Plaster in situ (n=1)* | *Very distressed and poor vision (n=1)* |
| Possible to obtain measurements but challenging | n=6 | n=3 | n=1 | n=3 |
| *Reason(s)* | *Couldn’t straighten leg (n=4); Fixed deformity at knee due to spina bifida (n=1); Dislocated hip (n=1); Dystonic movements (n=1)* | *Fixed contracture at elbow (n=1); Dystonic movements (n=2)* | *Landmarks difficult to find (n=1)* | *Dystonic movements (n=2); Equinovarus*  *deformity at ankle (n=1)* |

**Table S4. Reasons for difficulty in obtaining waist circumferences, weight and bioimpedance in non-standers.**

|  | True waist | Umbilical waist | Bioimpedance | Weight |
| --- | --- | --- | --- | --- |
| Not possible to obtain measurement | n=4 | n=2 | n=5 | n=2 |
| *Reason(s)* | *Spinal brace in situ (n=1); Uncooperative and poor vision (n=1); Did not co-operate for a 2nd measurement (n=1); Ileal conduit in place, not possible to find landmark (n=11)* | *Spinal brace in situ (n=1); Uncooperative and poor vision (n=1)* | *Moved too much (n=1); Won’t lie supine (n=1); Uncooperative and poor vision (n=1); Uncooperative, pulled electrodes off (n=1); Vagal nerve stimulator in place - contraindicated (n=1)* | *Uncooperative and poor vision (n=1); Cooperated for one weight only and wouldn’t stay still (n=1)* |
| Possible to obtain measurements but challenging | n=8 | n=3 | n=3 | n=0 |
| *Reason(s)* | *Landmarks difficult to find (n=2); Landmarks close together (n=1); Landmarks difficult due to scoliosis / kyphosis (n=3); Landmarks difficult for skinfolds due to obesity (n=1); Landmarks difficult due to ileal conduit bag and belt (n=1)* | *Landmarks difficult on one occasion due to spina bifida and scoliosis (n=1); Landmarks difficult for abdominal skinfoldsdue to obesity (n=1); Landmarks difficult due to ileal conduit bag and belt (n=1)* | *Moved (n=2); Moved taking time to settle – battery died (n=1)* |  |

**Table S5. Reasons for difficulty in obtaining skinfold measurements in standers.**

|  | Triceps | Biceps | Subscapular | Supra-iliac |
| --- | --- | --- | --- | --- |
| Not possible to obtain measurement | n=2 | n=5 | n=6 | n=12 |
| *Reason(s)* | *Uncooperative (n=2)* | *Uncooperative (n=2);Very distressed (n=1); Wary of of calipers (n=2)* | Uncooperative (n=3); Very distressed (n=1); Wary of calipers (n=2) | Refused (n=5); Uncooperative (n=3); Very distressed (n=1); Wary of calipers (n=1); Difficulty in finding landmarks (n=2) |
| Possible to obtain measurements but challenging | n=1 | n=0 | n=3 | n=2 |
| *Reason(s)* | *Refused 2nd measurement* (n=1) |  | *Wouldn’t allow calipers touch the child (n=1); Uncooperative for one of two measurements (n=2)* | *Uncooperative for one of two measurements (n=2)* |

**Table S6. Reasons for difficulty in obtaining waist measurements and bioimpedance in standers**.

|  | True waist | Umbilical waist | Bioimpedance |
| --- | --- | --- | --- |
| Not possible to obtain measurement | n=3 | n=2 | n=5 |
| *Reason(s)* | *Refused (n=2); Very distressed (n=1)* | *Uncooperative (n=1); Very distressed (n=1)* | *Refused (n=1); Pulled off stickers or leads (n=2); Wouldn’t lie still (n=1); Uncooperative n=1)* |
| Possible to obtain measurements but challenging | n=4 | n=3 | n=1 |
| *Reason(s)* | *Refused one of two measurements (n=2); Giggling too much on one occasion (n=1); Only with T-shirt on one occasion (n=1)* | *Refused one of two measurements (n=3)* | *Refused one of two measurements (n=1)* |
